# Supplementary material for: Live imaging analysis of the growth plate in a murine long bone explanted culture system
Source: PubMed Central journal article supplement (PMC6037772; doi:10.1038/s41598-018-28742-x), 2018-07-09

## Supplementary Information

### **Live imaging analysis of the growth plate in a murine long bone explanted culture system**

Keisho Hirota, Akihiro Yasoda, Yugo Kanai, Yohei Ueda, Ichiro Yamauchi, Takafumi Yamashita, Yoriko Sakane, Toshihito Fujii and Nobuya Inagaki

**Supplementary Figure: Histological Picture of distal growth plates in fetal murine ulnar explants after 18-hour culture period.** Growth plates unexposed (upper picture) or exposed (lower picture) by fluorescence are shown.

**Supplementary Video: Time-lapse imaging of the explanted fetal murine ulnar growth plates for 18 hours.** Red arrowheads indicate representative chondrocytes in the proliferative zone (proliferative chondrocytes), and their trajectories are shown in green lines. Vehicle-treated (left) and CNP-treated (right) explants are shown.

# Supplementary Figure

Control

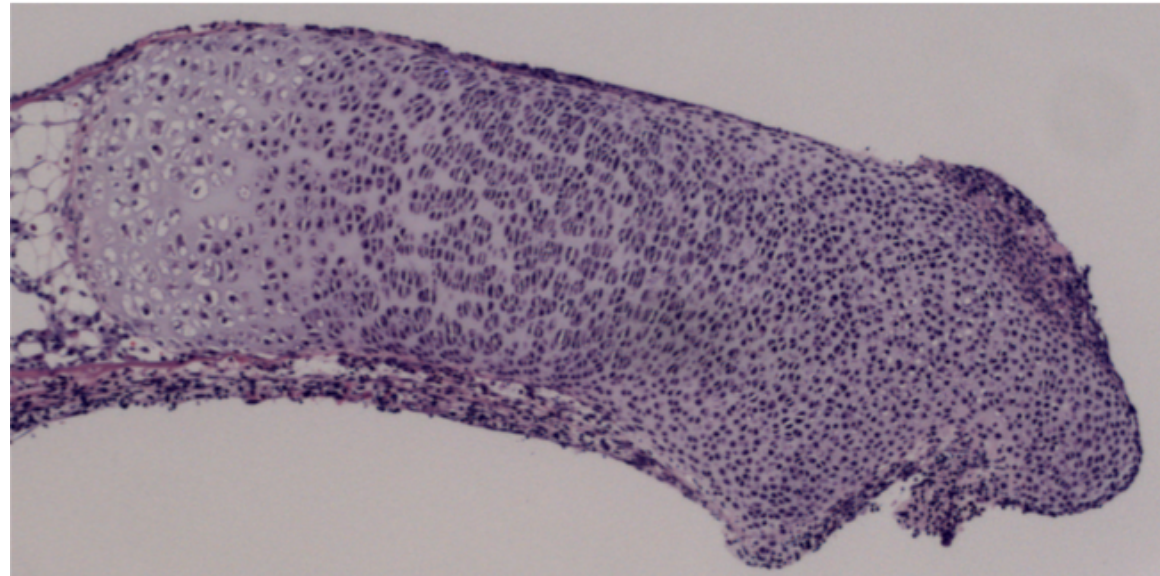

LCV-MPE

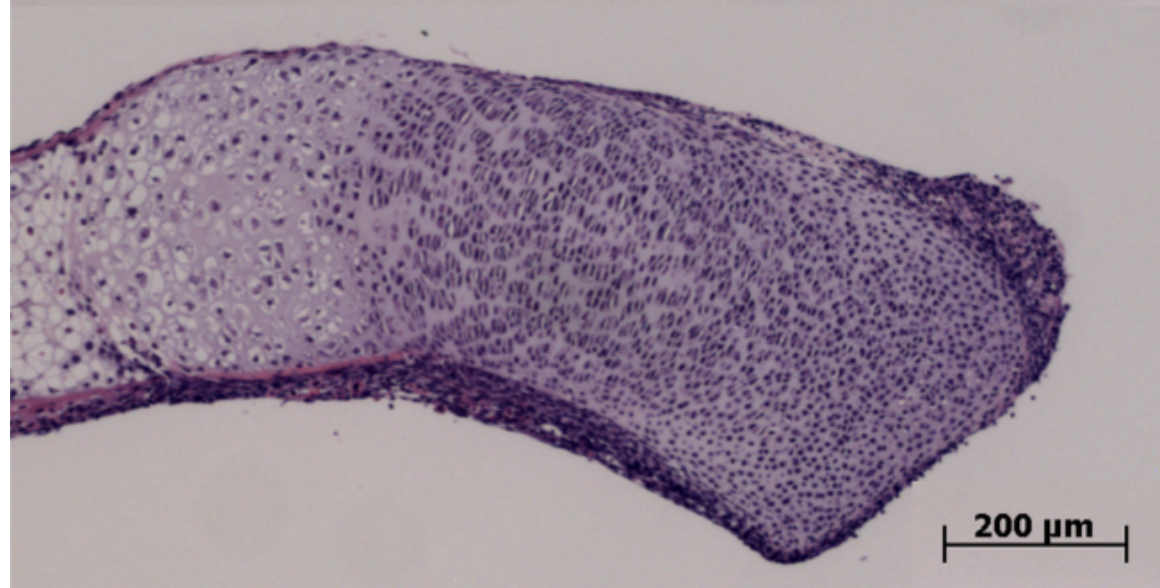

Supplement: 41598_2018_28742_MOESM1_ESM.pdf [file 41598_2018_28742_MOESM1_ESM.pdf]
